# Supplementary material
Source: PubMed Central journal article supplement (PMC3757939)

Original Image ID:  
Sep21-05

Positional Information

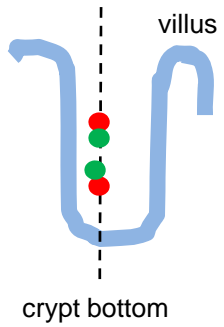

- positionally corresponds to transit-amplifying cell
- does not correspond to stem cell position
- likely stem cell towards bottom of crypt (yellow arrow)

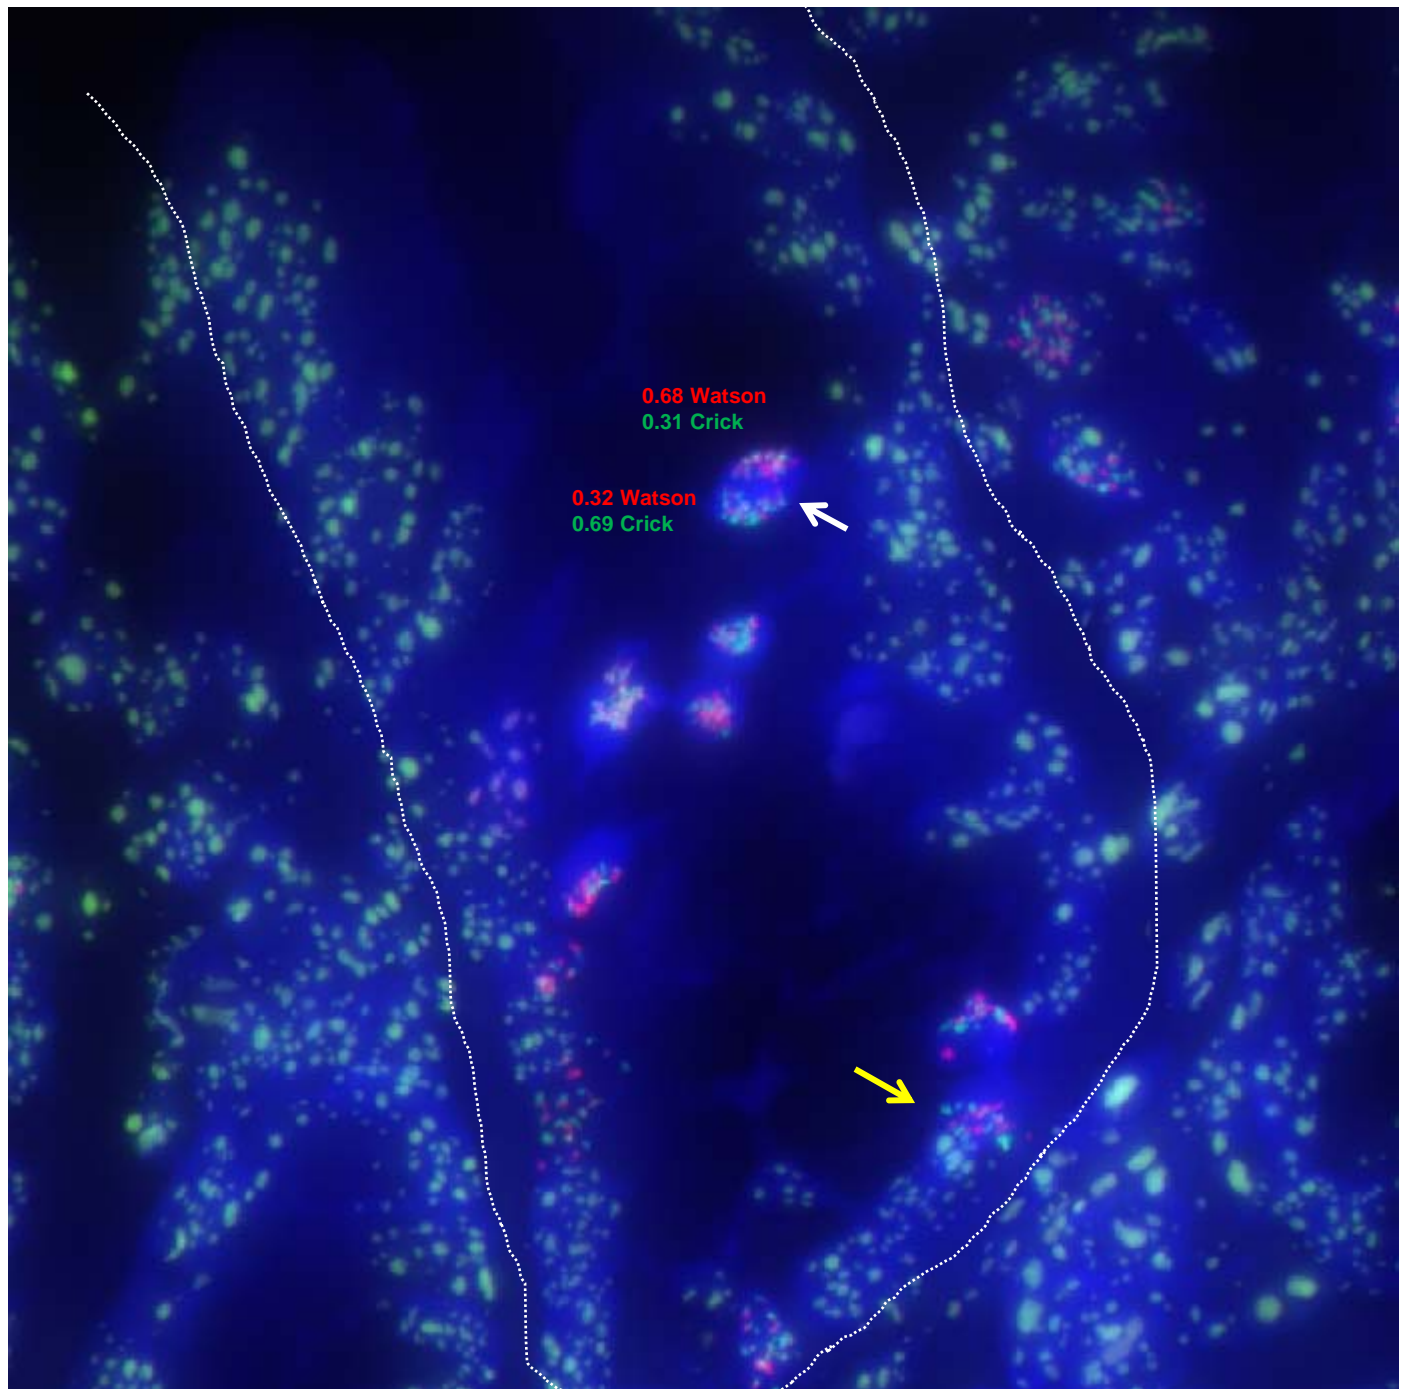

Original Image ID:  
Aug2-49

Putative Positional Information

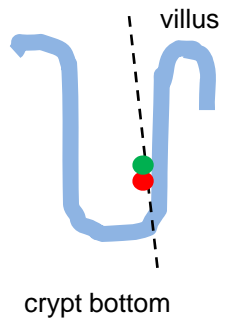

- positionally corresponds to transit-amplifying cell
- does not correspond to stem cell position at crypt bottom

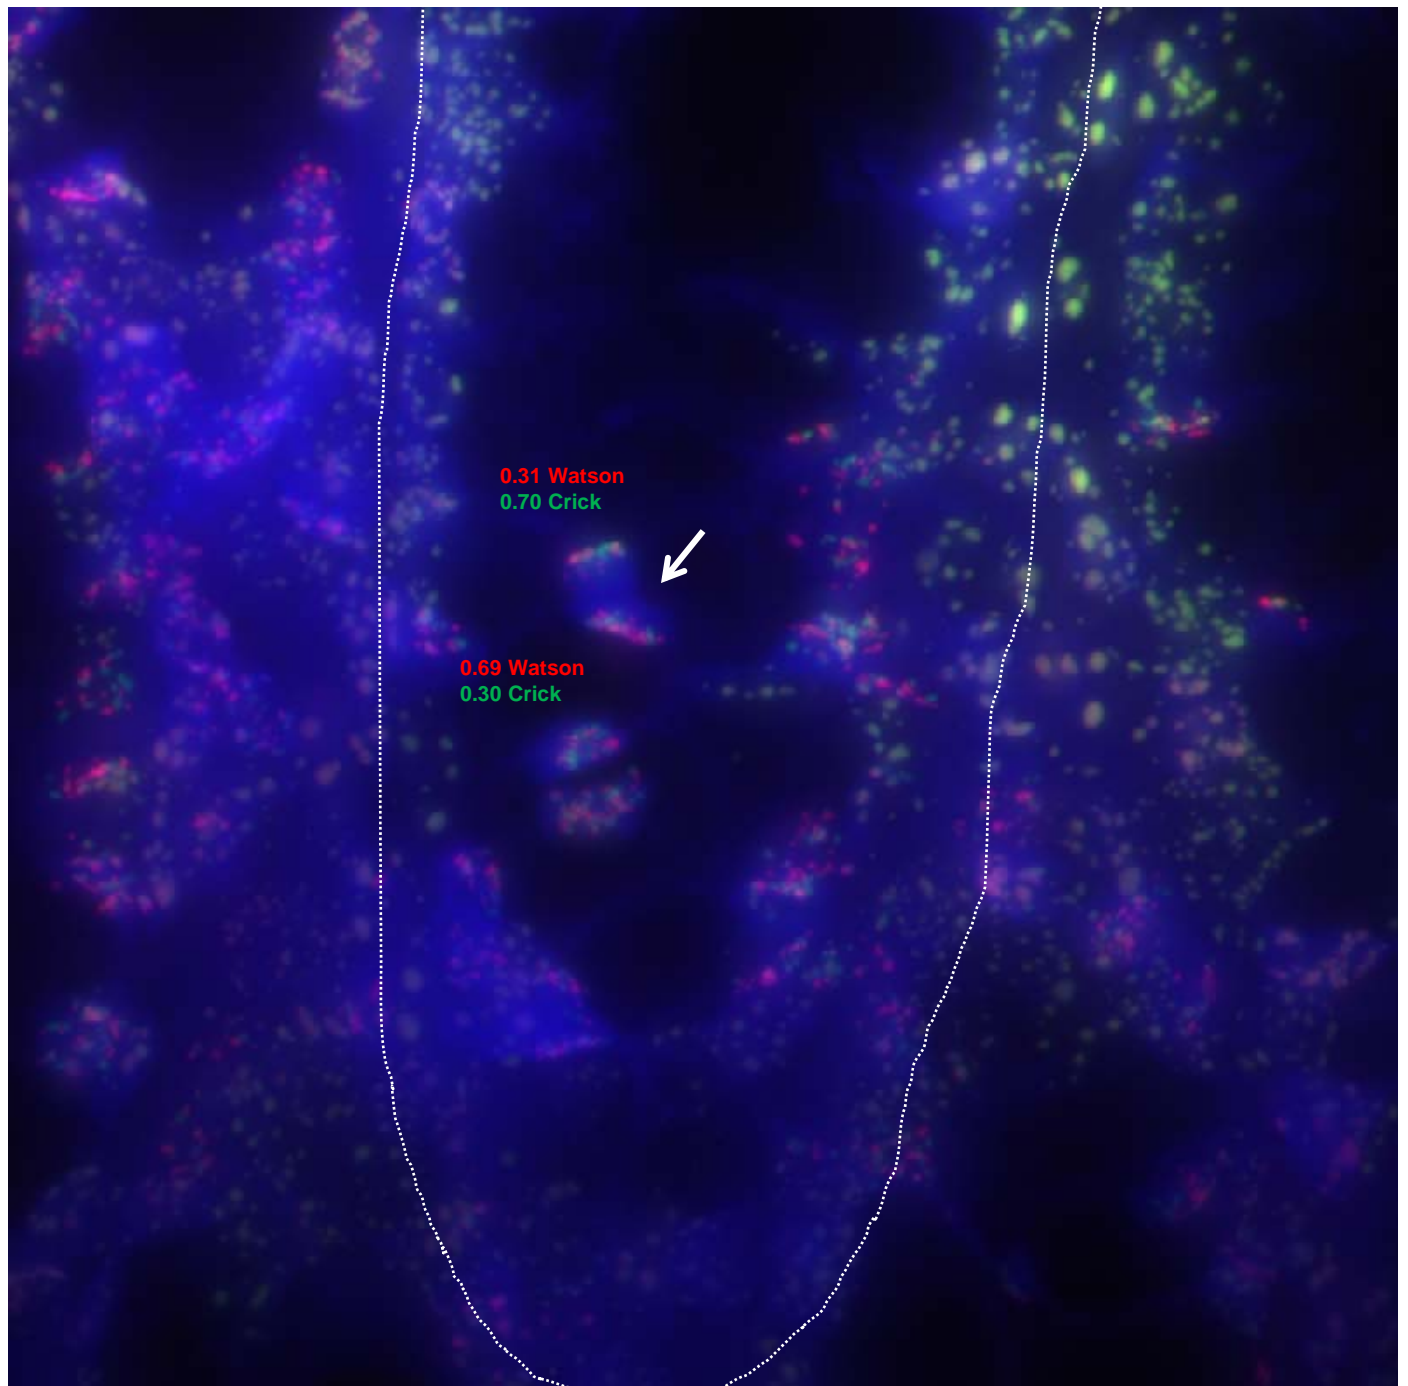

Original Image ID:  
July30-25

Putative Positional Information

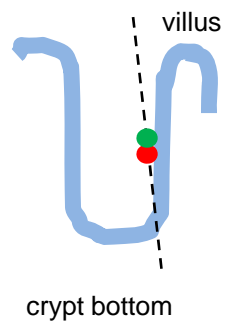

- positionally corresponds to transit-amplifying cell
- does not correspond to stem cell position at crypt bottom

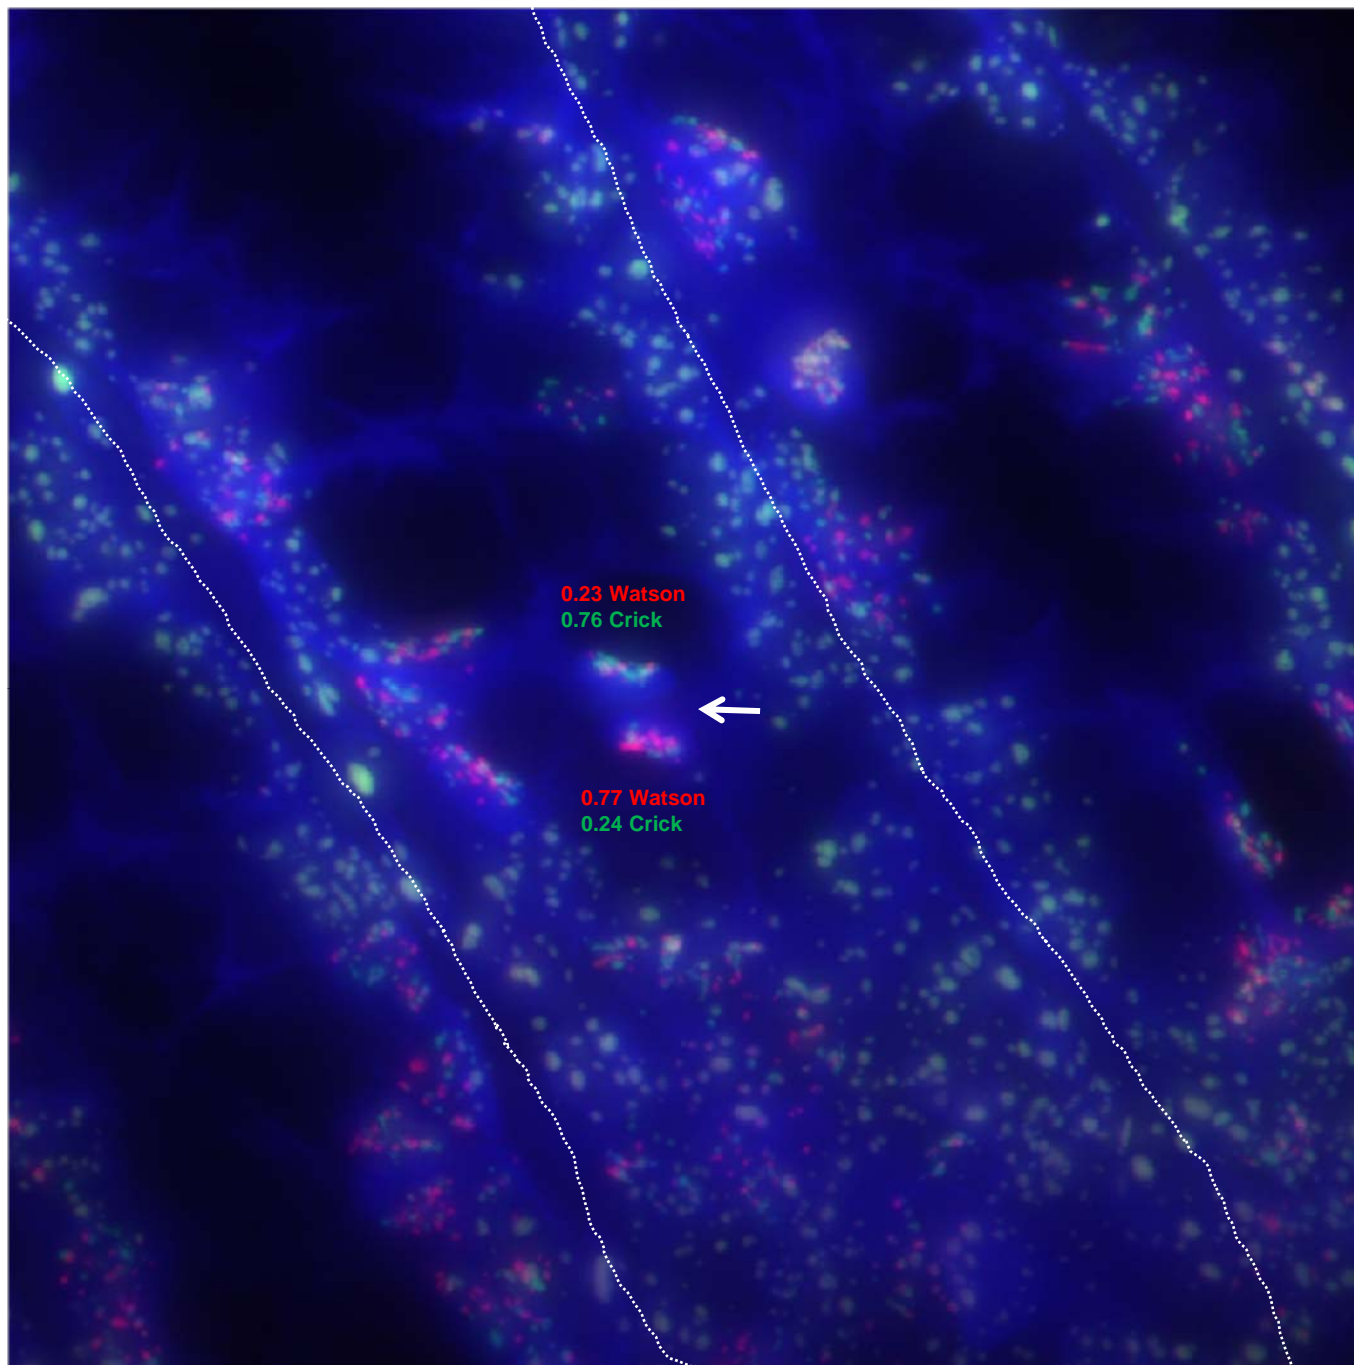

Original Image ID:  
Aug10-108

**Putative Positional Information**

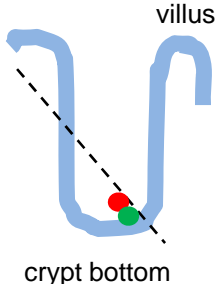

•may positionally correspond to stem cell

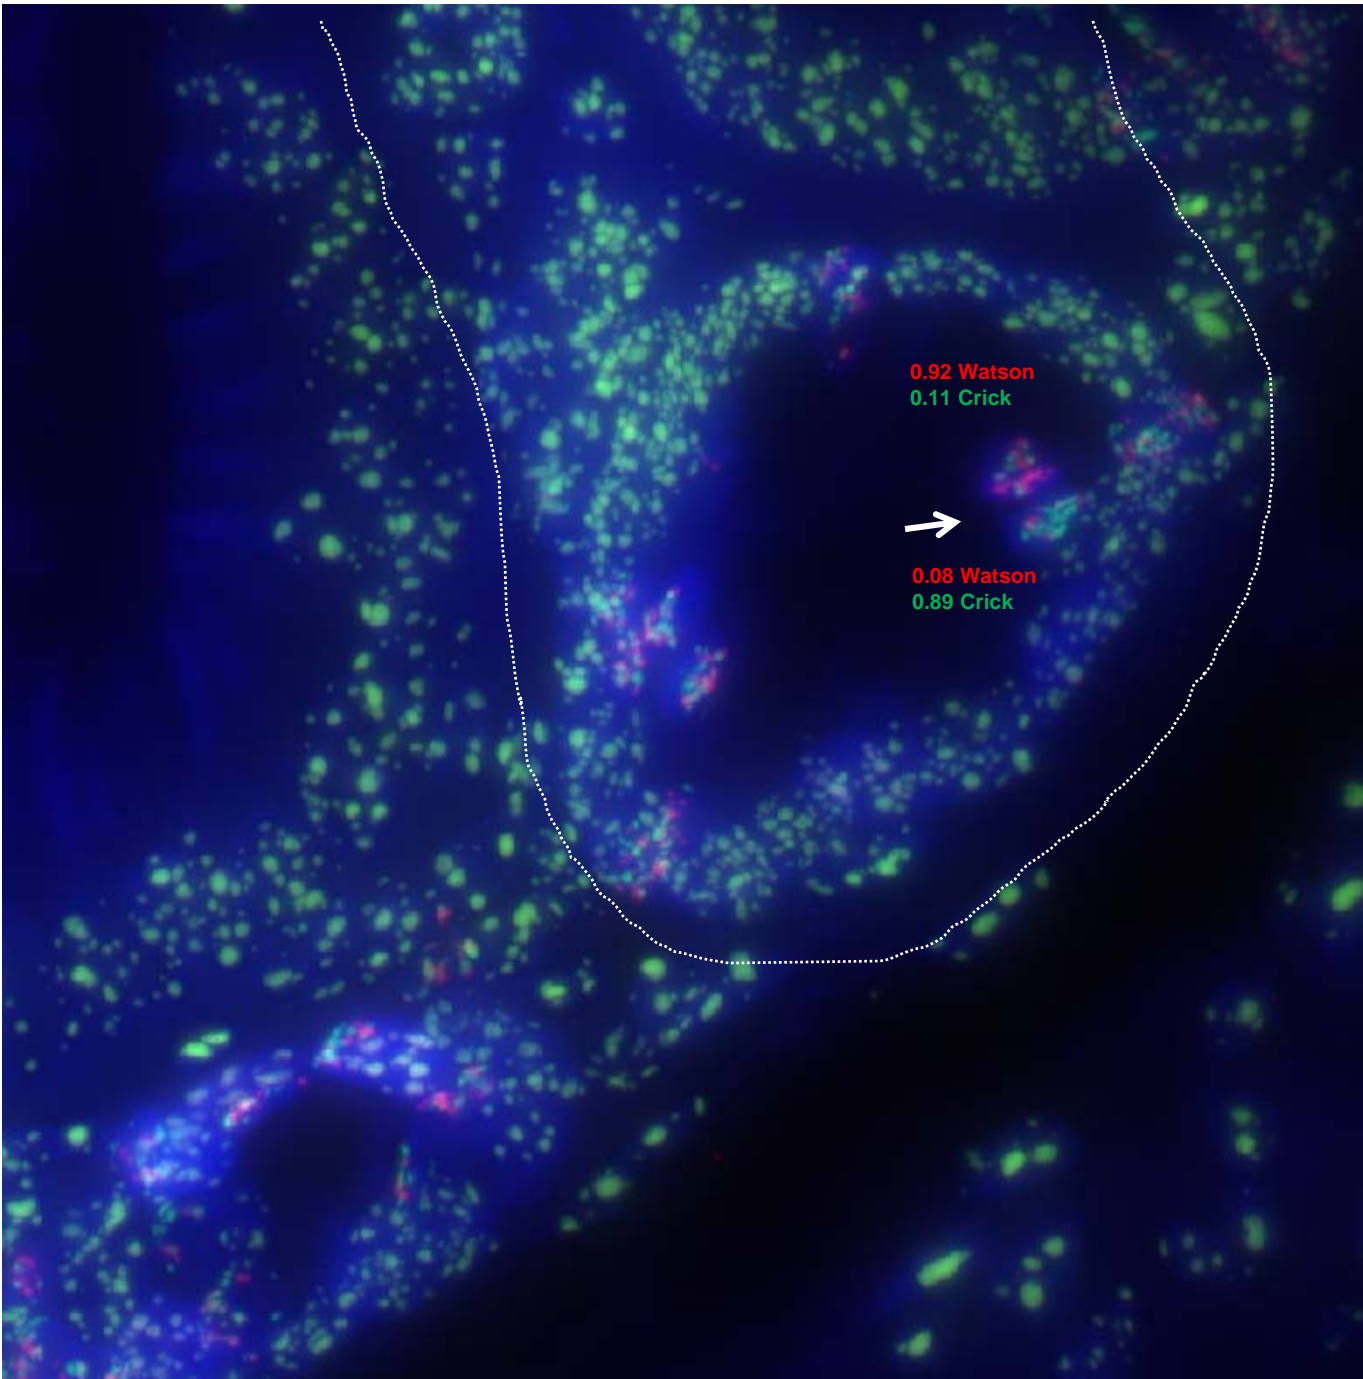

Original Image ID:  
Oct9-03

**Putative Positional Information**

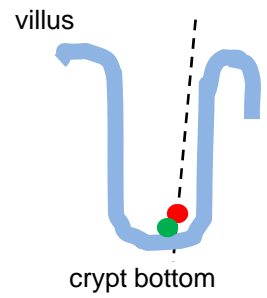

•may positionally correspond  
to stem cell

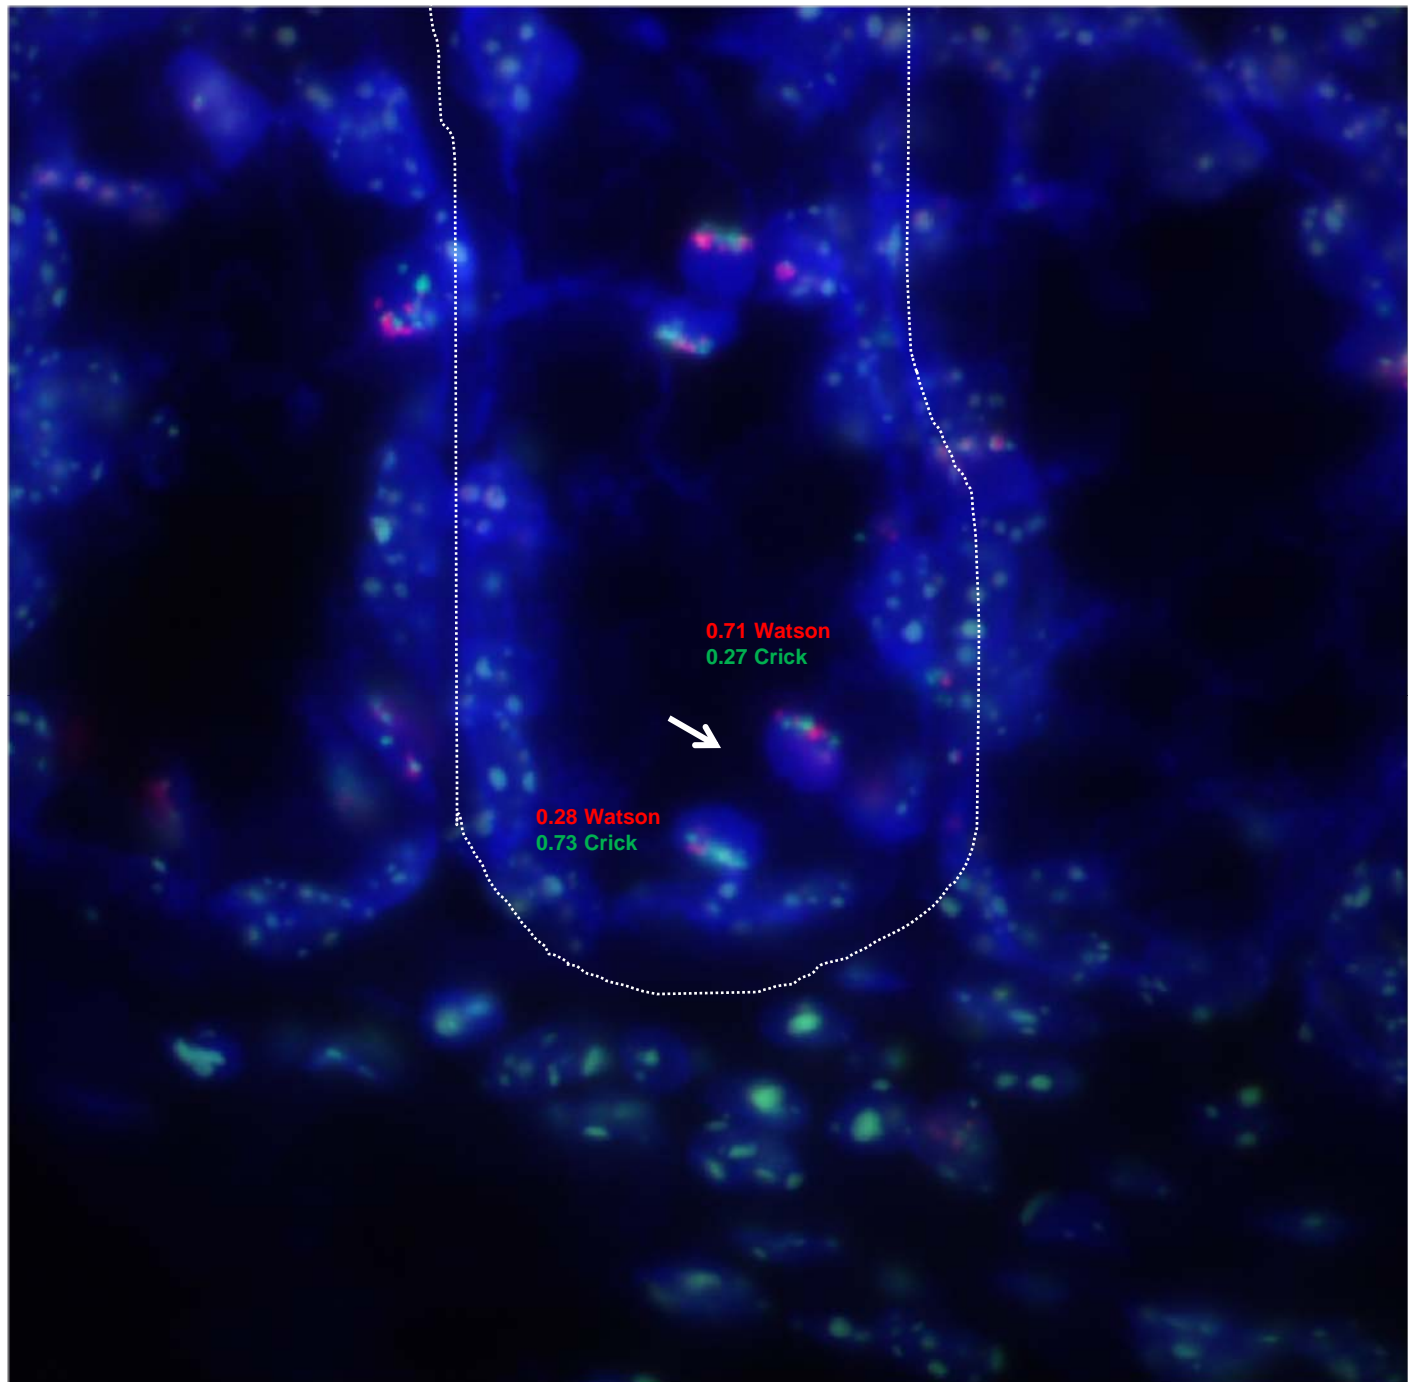

Original Image ID:  
Aug7-77

•cannot determine exact crypt  
position, but likely not crypt  
bottom

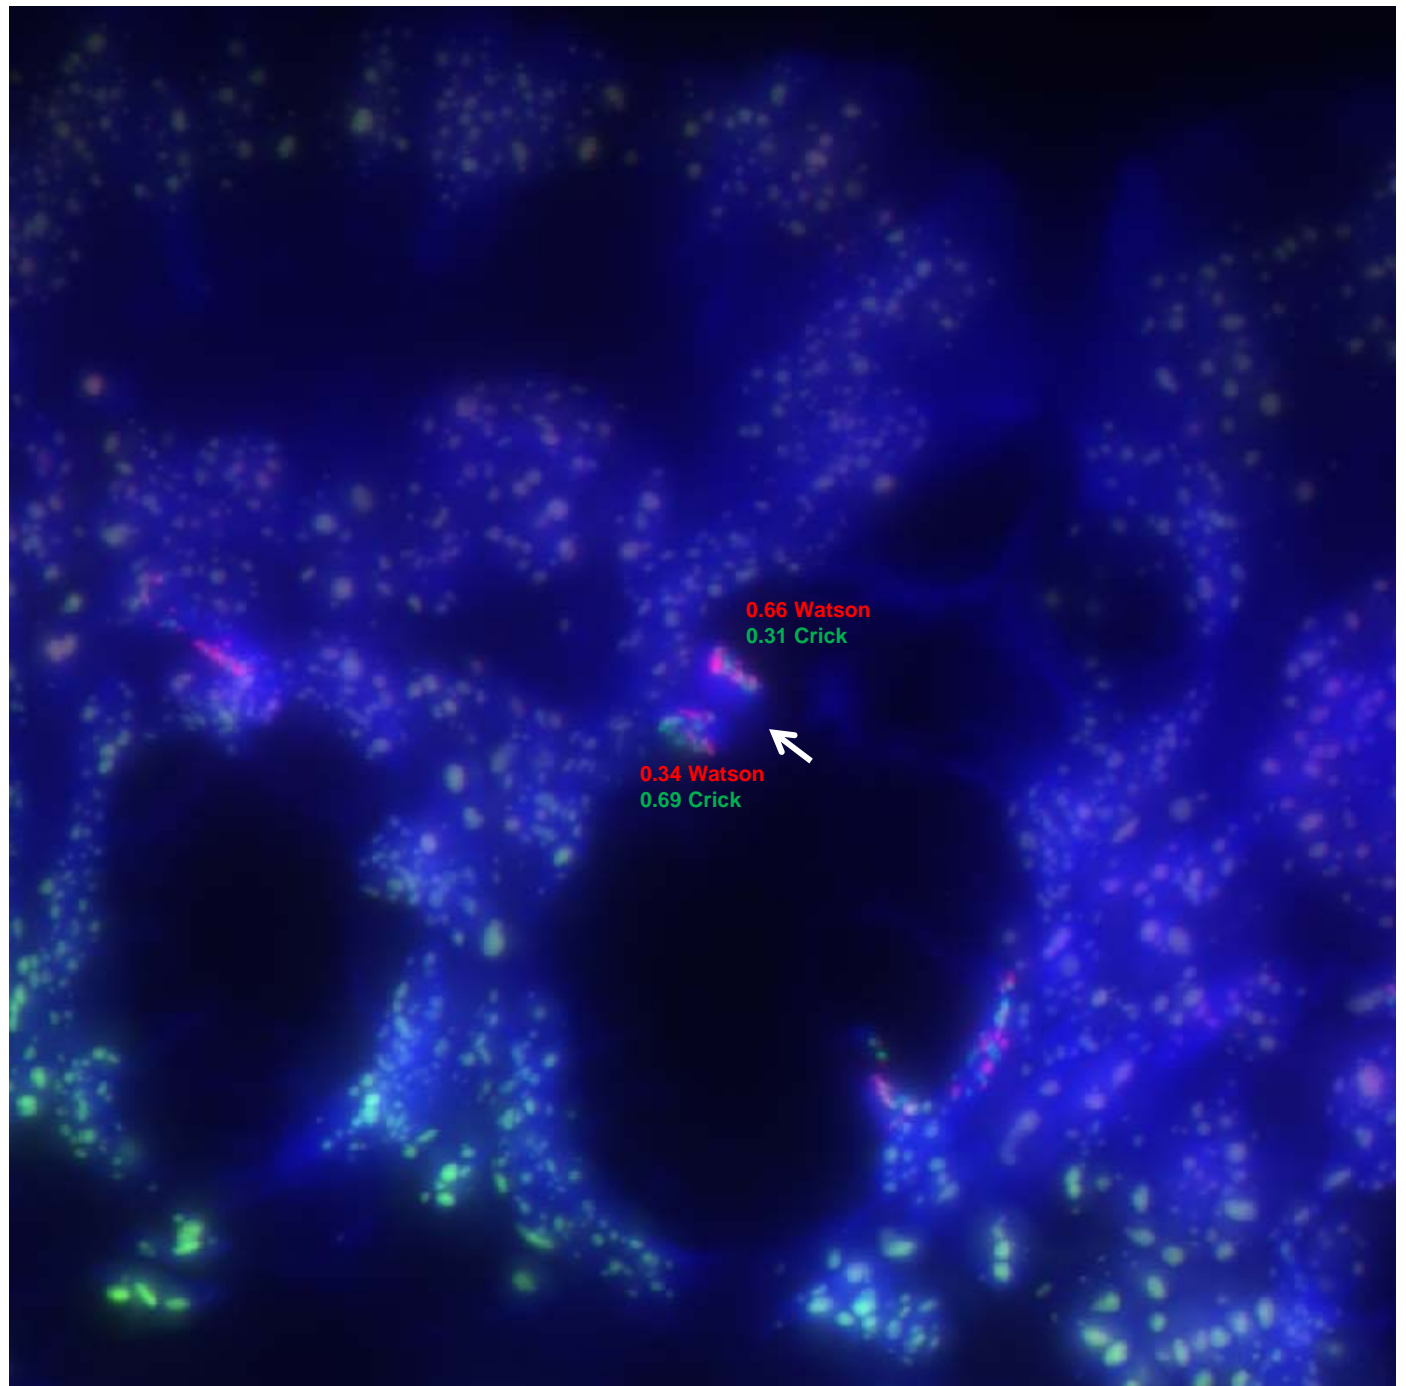

Original Image ID:  
Nov13-02

•cannot determine exact crypt  
position, but likely not crypt  
bottom

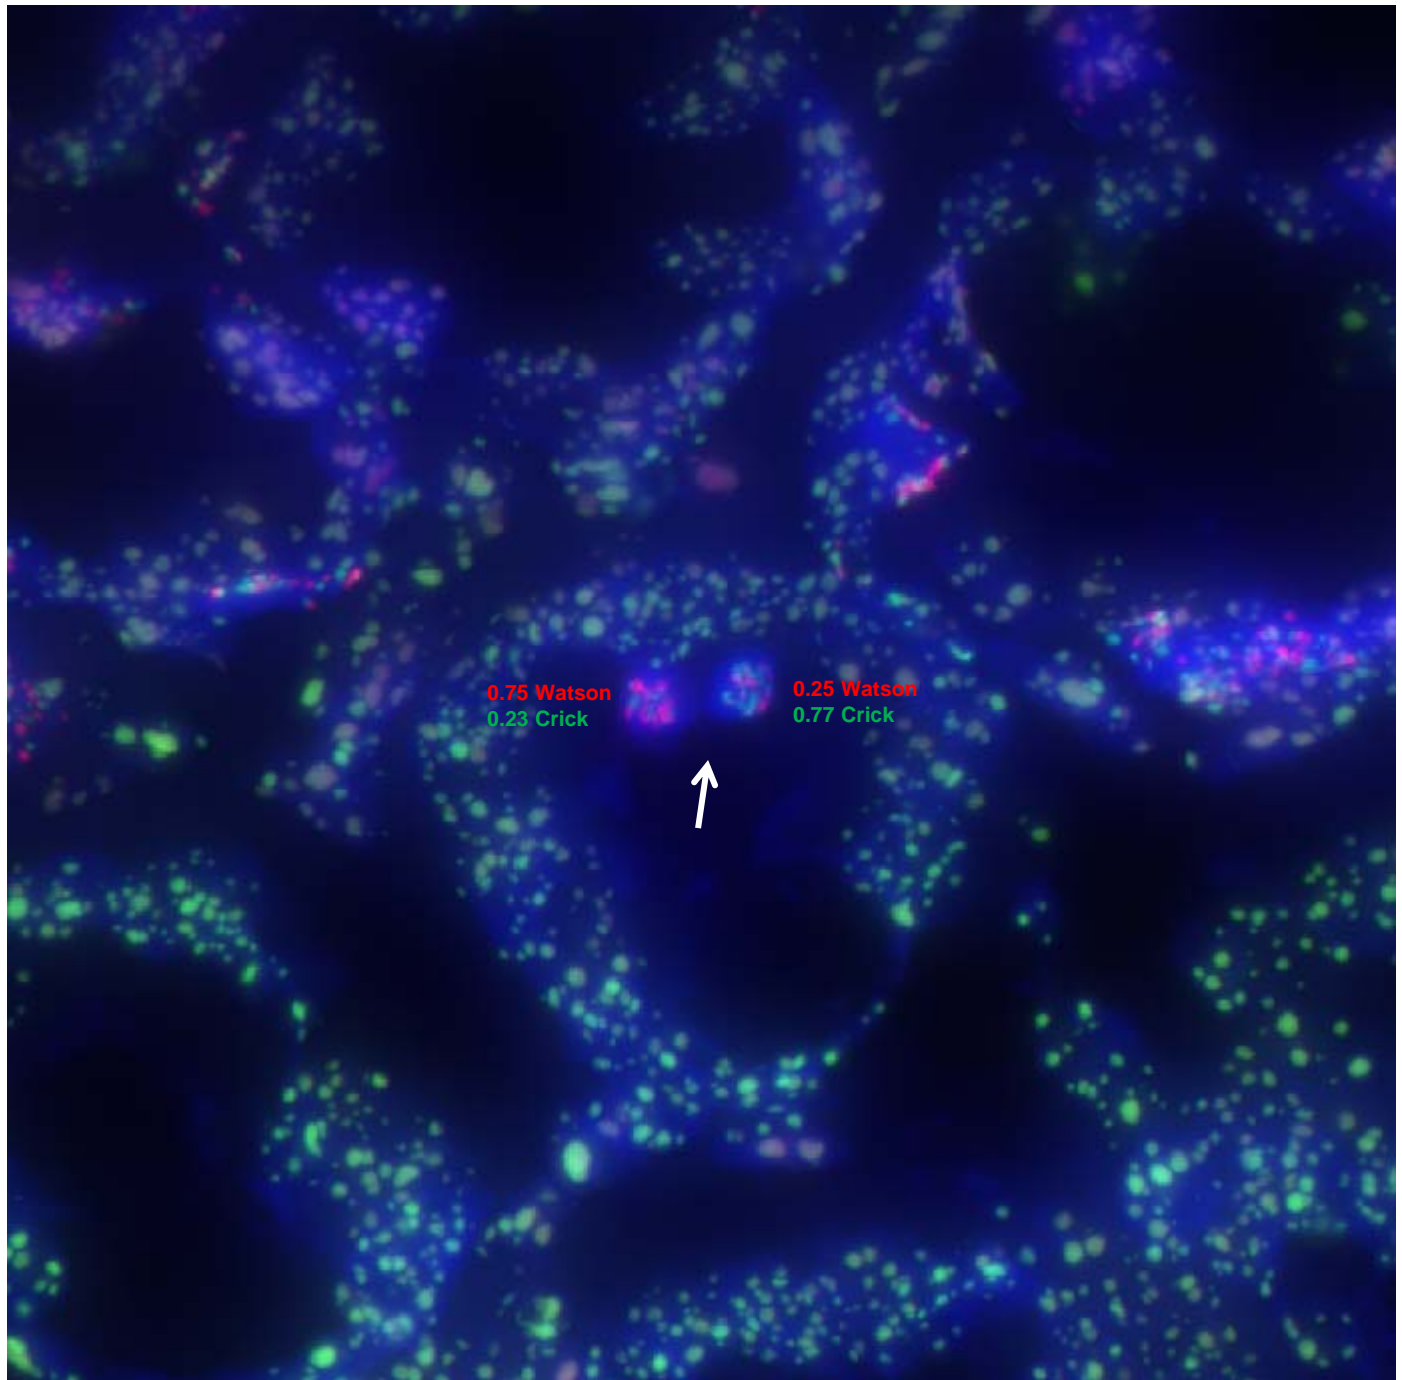

Original Image ID:  
Nov13-08

•cannot determine exact crypt  
position

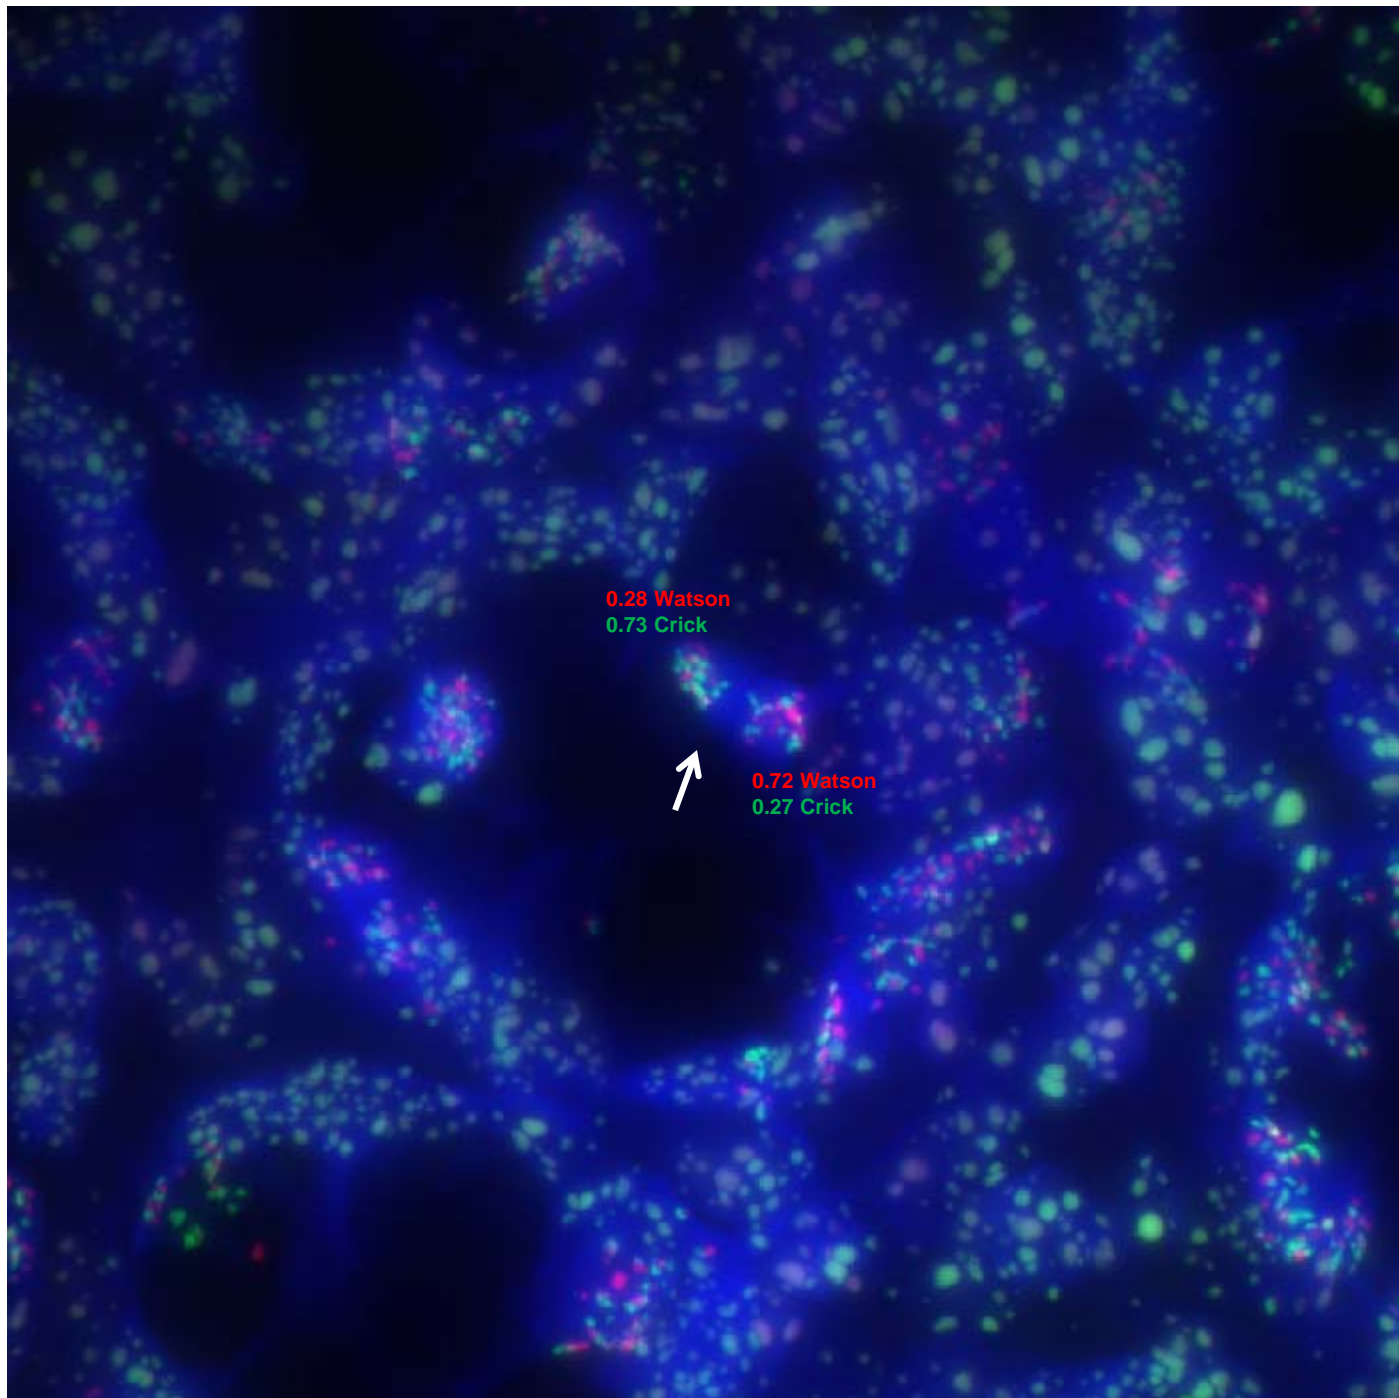



Original Image ID:  
Aug8-97

•cannot determine exact crypt  
position

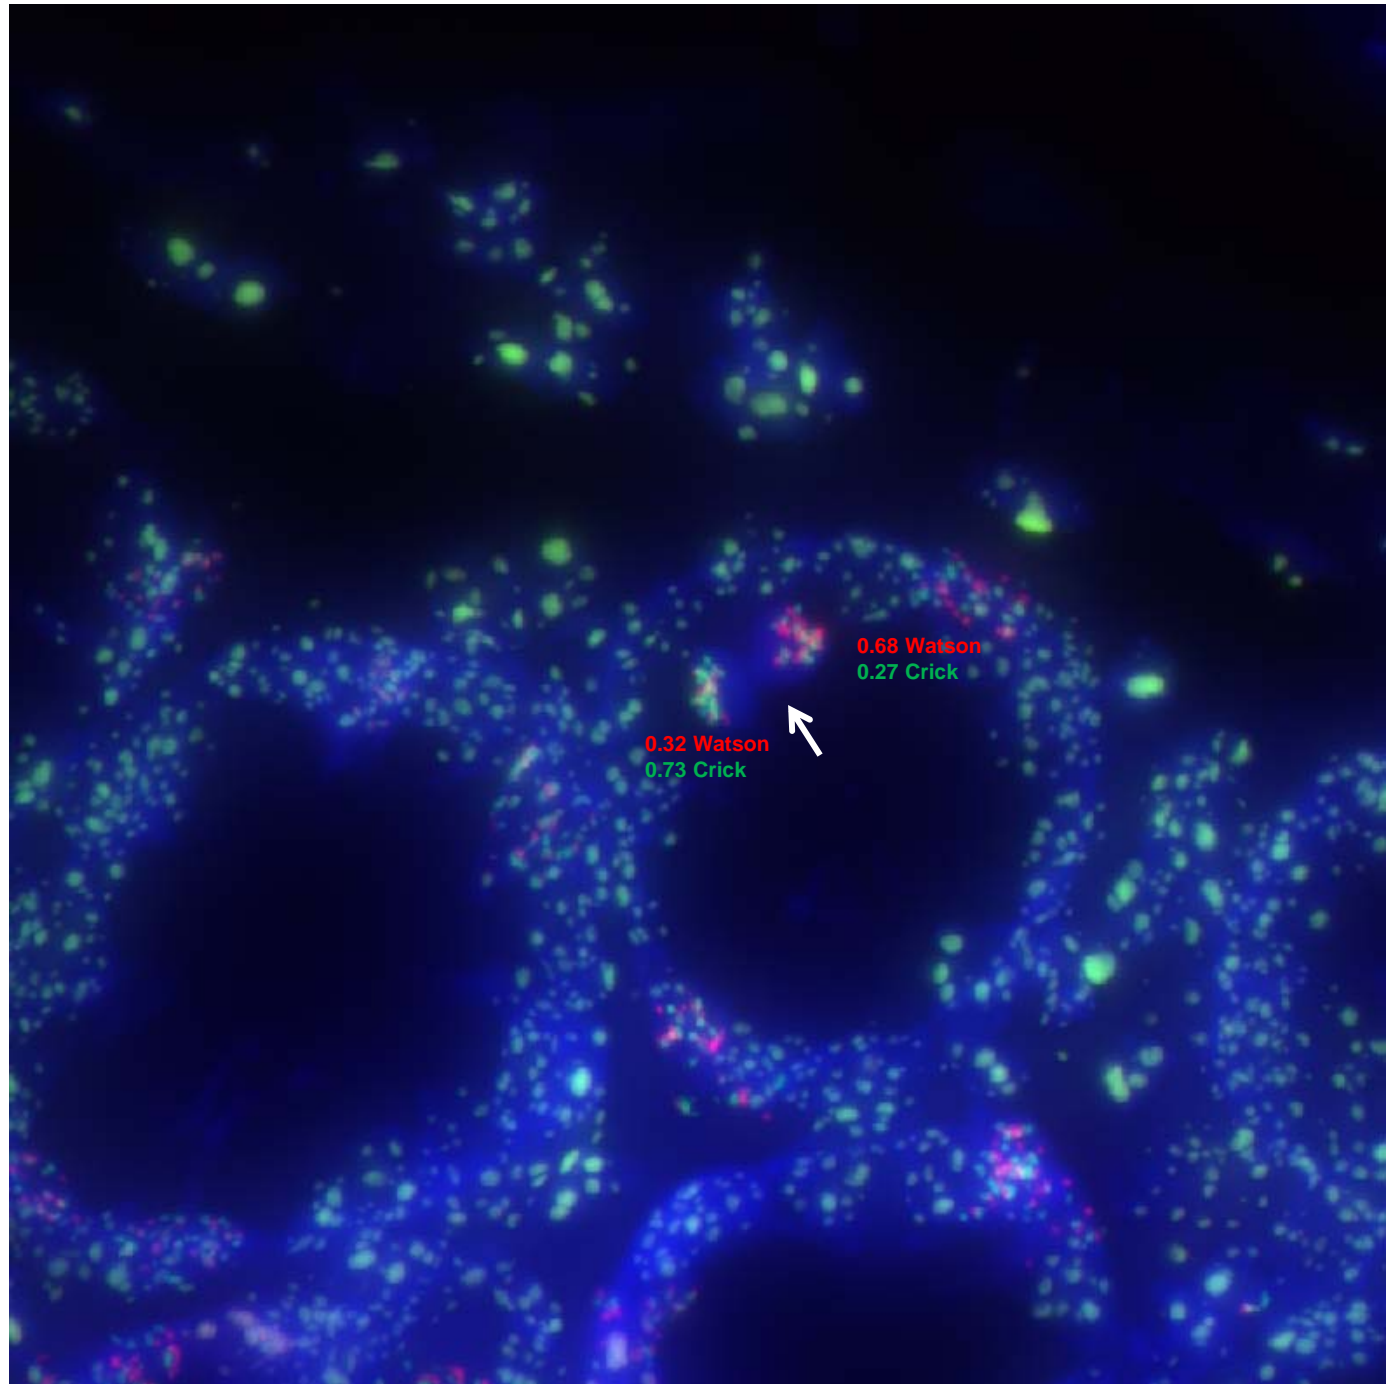

Original Image ID:  
Oct9-04

•cannot determine exact  
crypt position

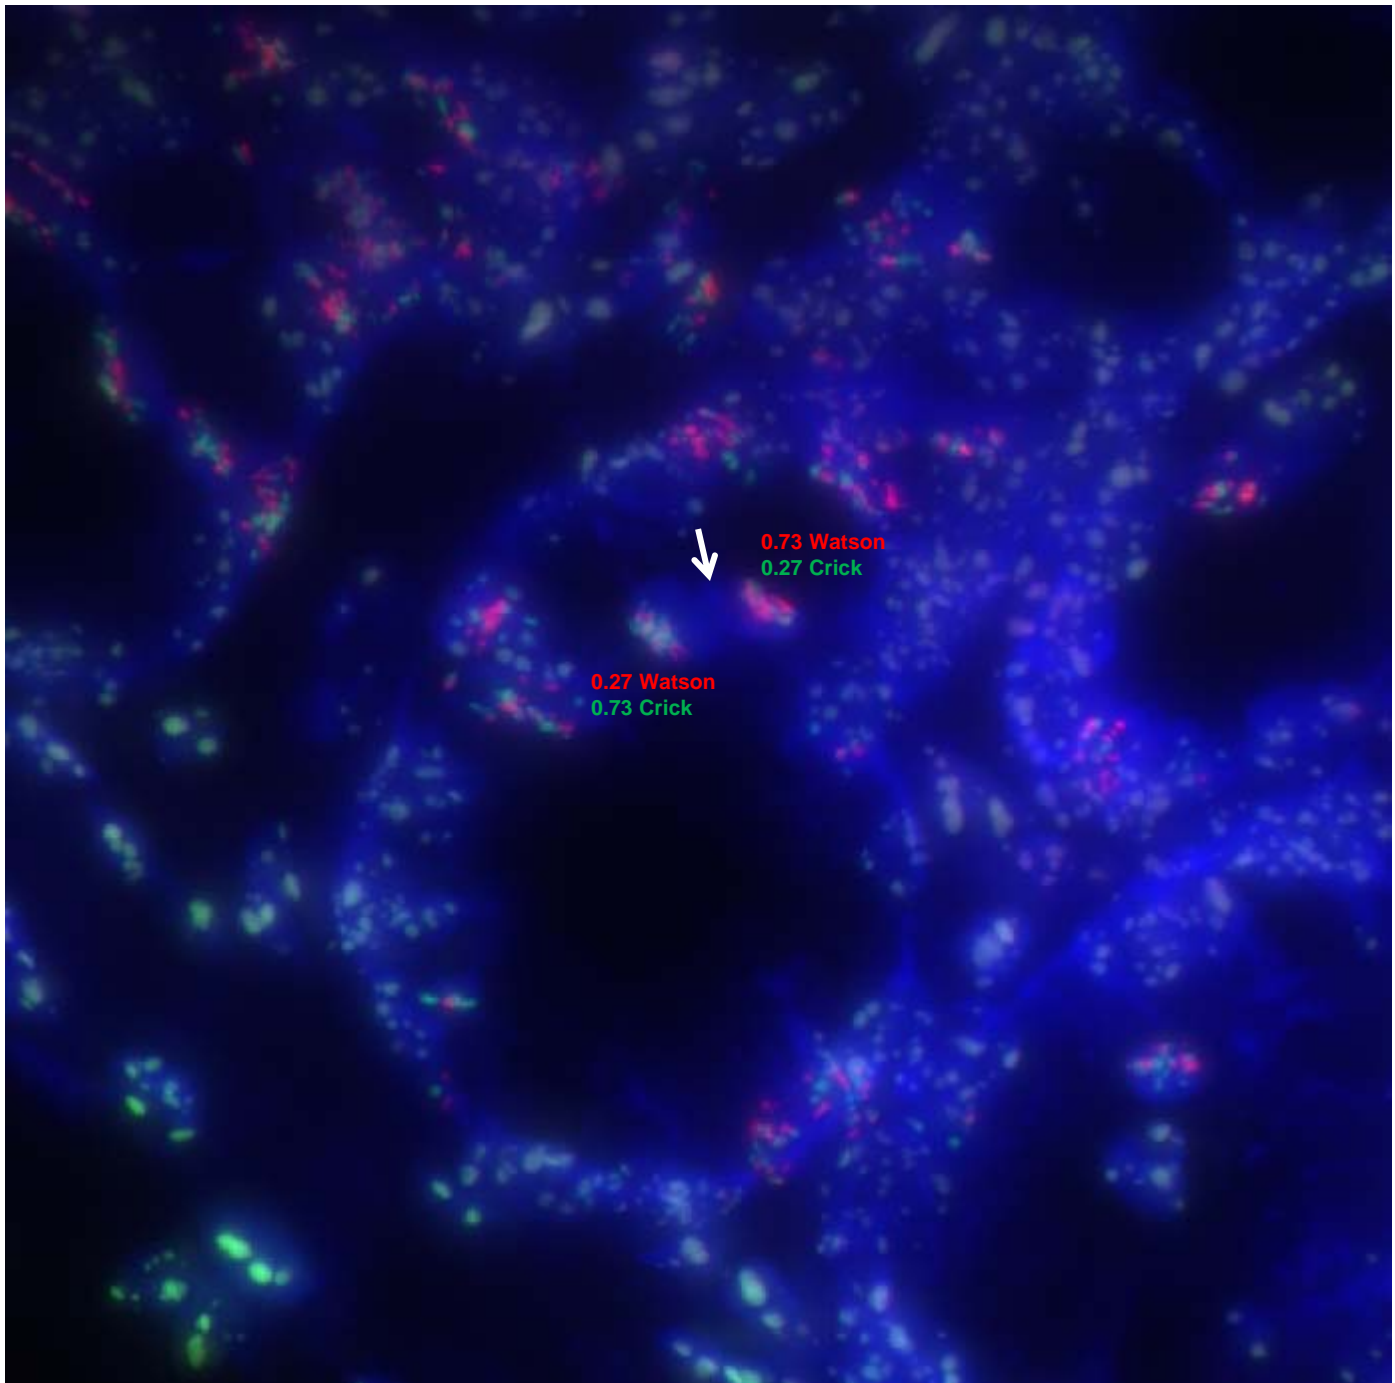

Supplement: NIHMS502550-supplement-Supplementary_Data_Image_Gallery.pdf [file NIHMS502550-supplement-Supplementary_Data_Image_Gallery.pdf]
